# Supplementary material for: Comparison between DySc2N@C80 and Dy2ScN@C80 single-molecule magnetic metallofullerenes encapsulated in single-wall carbon nanotubes
Source: Royal Society of Chemistry journal article supplement (doi:10.1039/d2dt00524g), 2022-01-01
Supplement: d2dt00524g1.pdf [file d2dt00524g1.pdf]

## Supporting Information

### **Comparison between DySc<sub>2</sub>N@C<sub>80</sub> and Dy<sub>2</sub>ScN@C<sub>80</sub> single-molecule magnetic metallofullerenes encapsulated in single-wall carbon nanotubes**

Satoshi Ito,<sup>a</sup> Ryo Nakanishi,<sup>a</sup> Keiichi Katoh,<sup>a</sup> Brian K. Breedlove,<sup>a</sup> Tetsu Sato,<sup>a</sup> Zhao-Yang Li,<sup>c</sup> Yoji Horii,<sup>\*b</sup> Masanori Wakizaka,<sup>\*a</sup> and Masahiro Yamashita<sup>\*a,c</sup>

<sup>a</sup> Department of Chemistry, Graduate School of Science, Tohoku University, 6-3 Aramaki-Aza-Aoba, Aoba-Ku, Sendai 980-8578, Japan

<sup>b</sup> Department of Chemistry, Faculty of Science, Nara Women's University, Nara 6308506, Japan

<sup>c</sup> School of Materials Science and Engineering, Nankai University, Tianjin 300350, China

E-mail:

horiy20@cc.nara-wu.ac.jp

masanori.wakizaka.a7@tohoku.ac.jp

yamasita@agnus.chem.tohoku.ac.jp

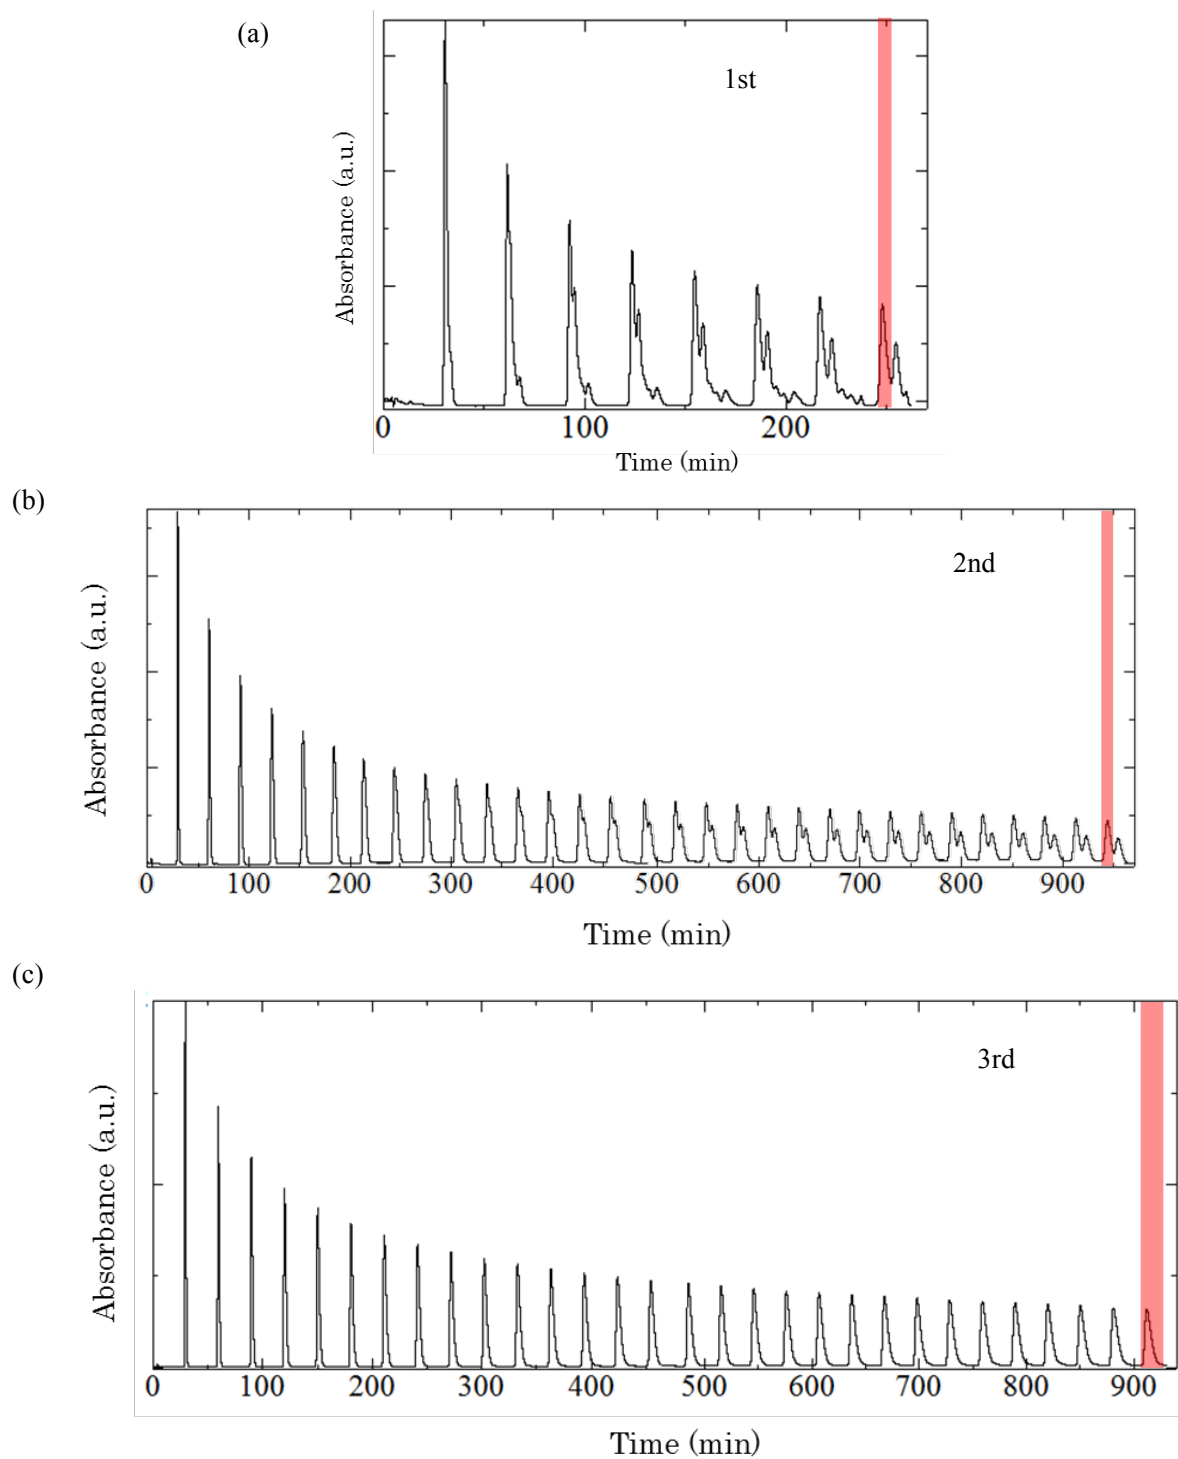

**Figure S1.** **Dy<sub>2</sub>** was purified with the three steps (a–c) using recycling HPLC. (a) The extract from the soot was purified and the peak indicated as red was collected. (b) This fraction was further purified, and the first peak indicated as red was collected. (c) Finally, the pure **Dy<sub>2</sub>** was obtained by collecting the peak indicated as red.

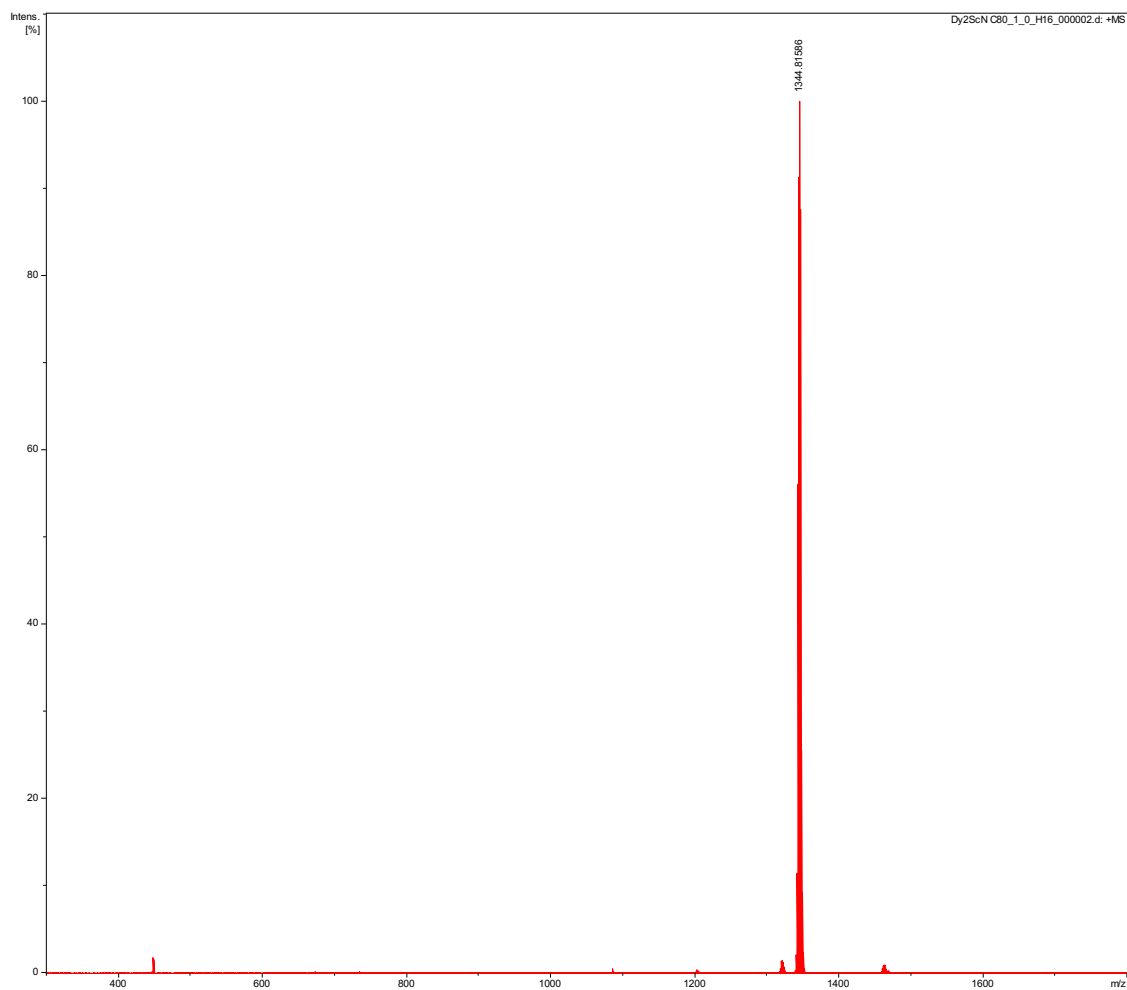

**Figure S2.** Mass spectrum of **Dy<sub>2</sub>** acquired using positive mode.

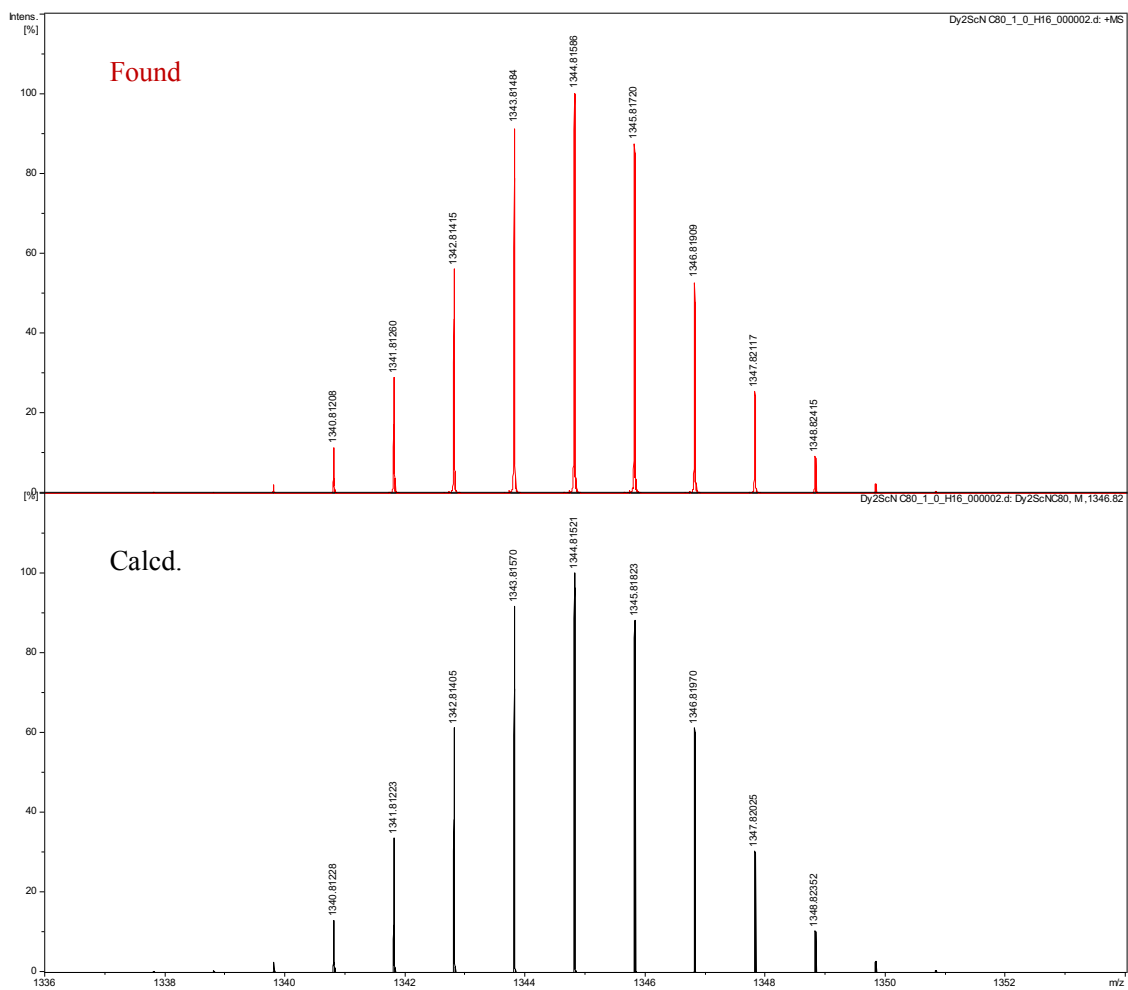

**Figure S3.** Comparison between experimental and calculated isotope patterns of  $Dy_2$ .

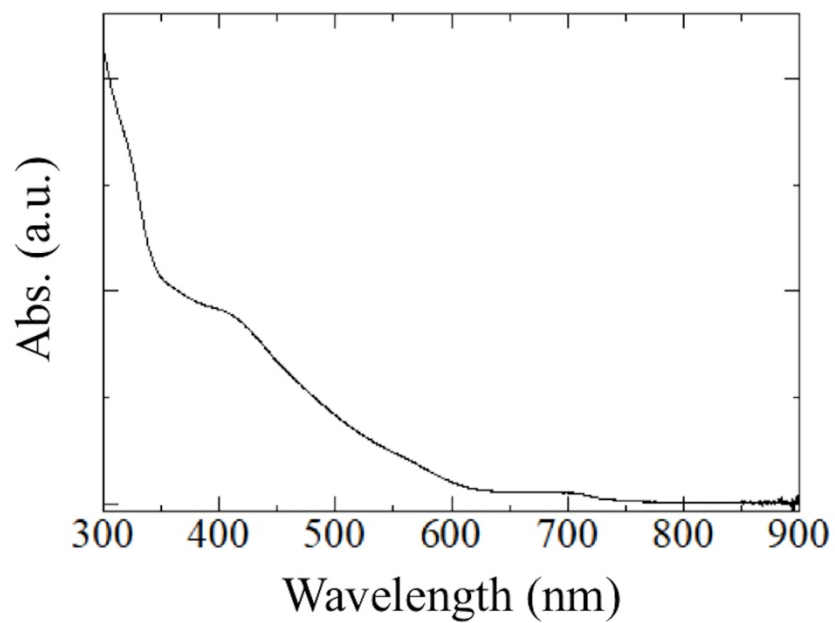

Figure S4. UV-Vis-NIR spectrum of  $\text{Dy}_2$  in toluene.

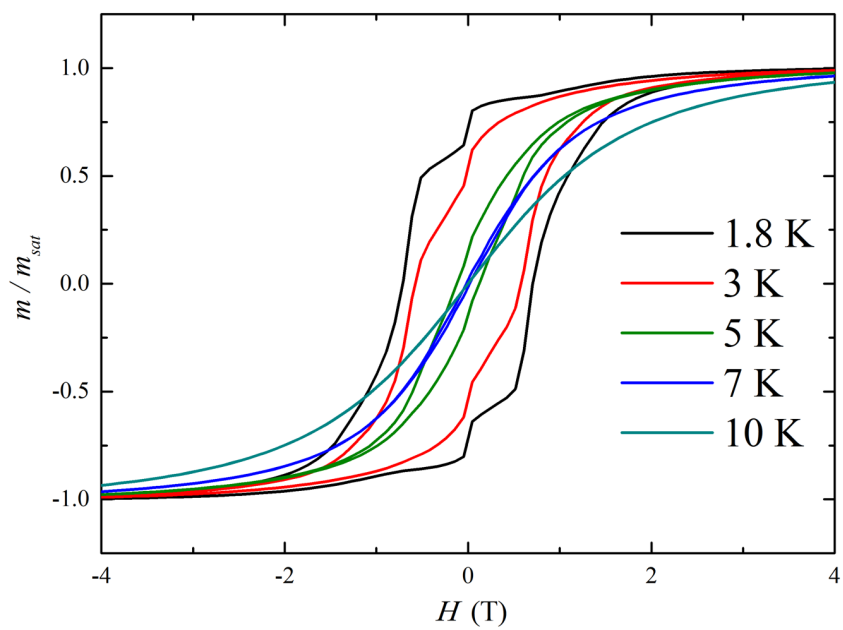

Figure S5.  $M$  vs.  $H$  curve for  $\text{Dy}_2$ .



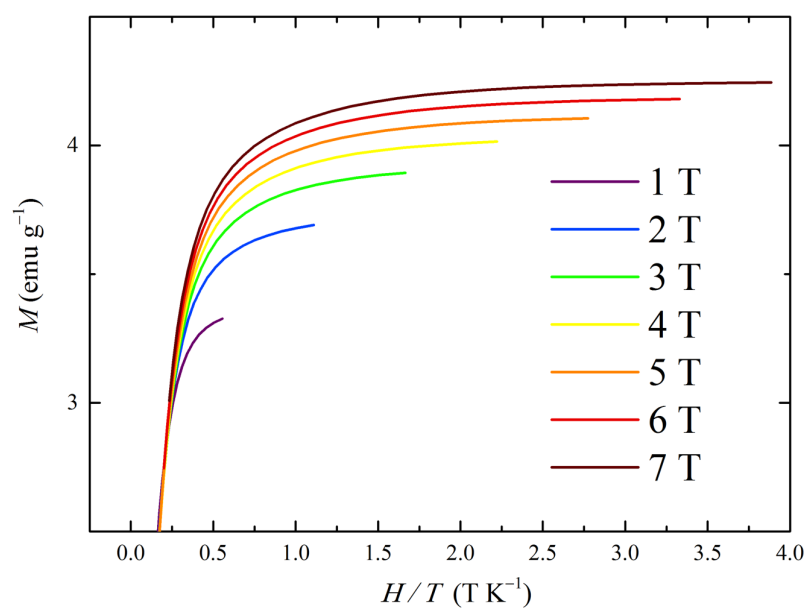

**Figure S8.**  $M$  vs.  $HT^{-1}$  plots for  $\text{Dy}_2@SWCNT$ .

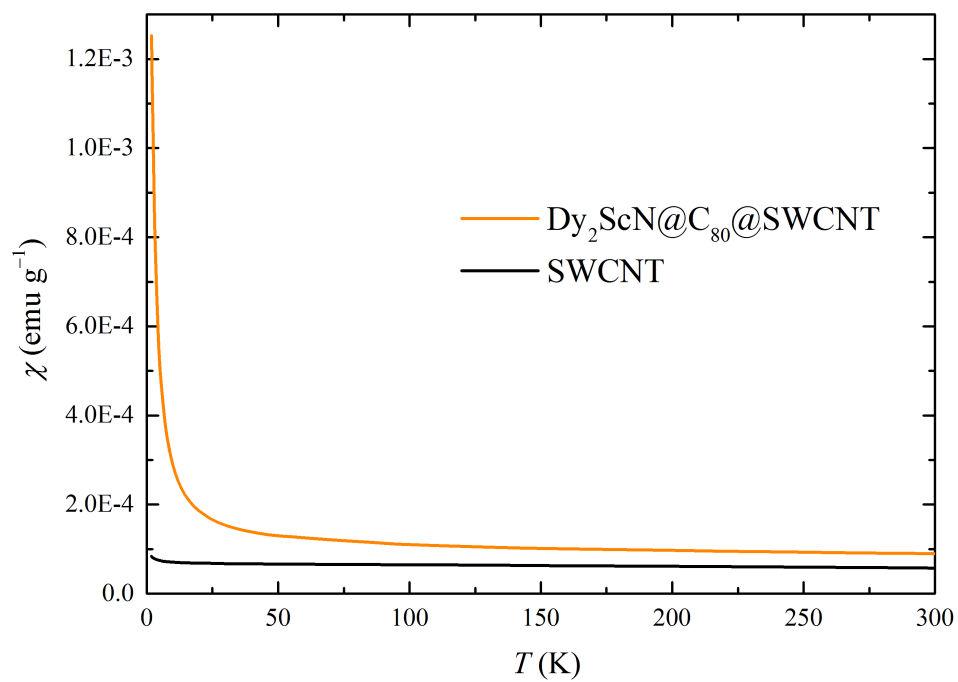

**Figure S9.**  $\chi$  vs.  $T$  for empty SWCNTs (black line) and  $\text{Dy}_2@SWCNT$  (orange line).

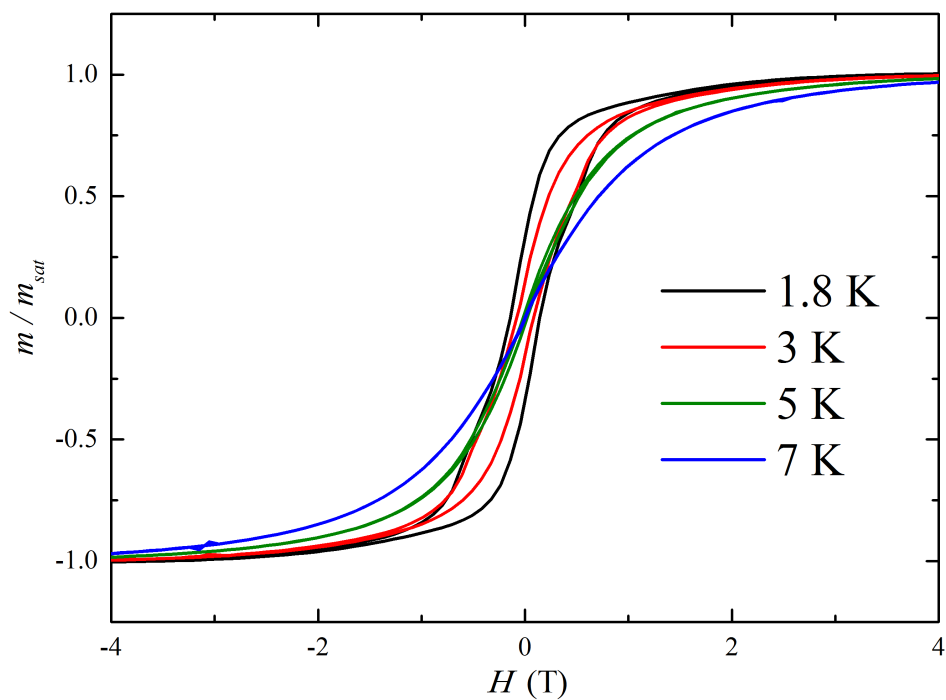

Figure S10.  $M$  vs.  $H$  curve for  $\text{Dy}_2@SWCNT$ .

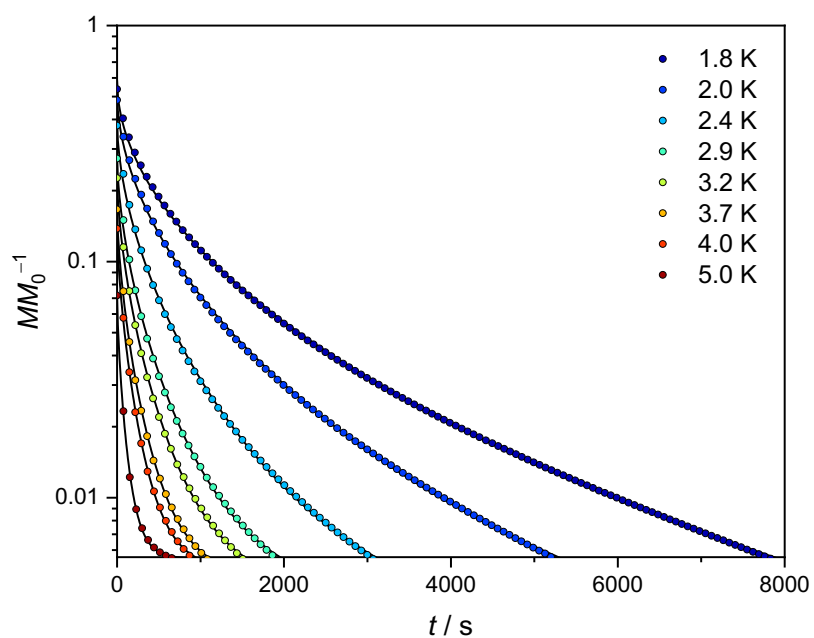

Figure S11. Temperature dependences of the magnetization decay for  $\text{Dy}_2@SWCNT$ .



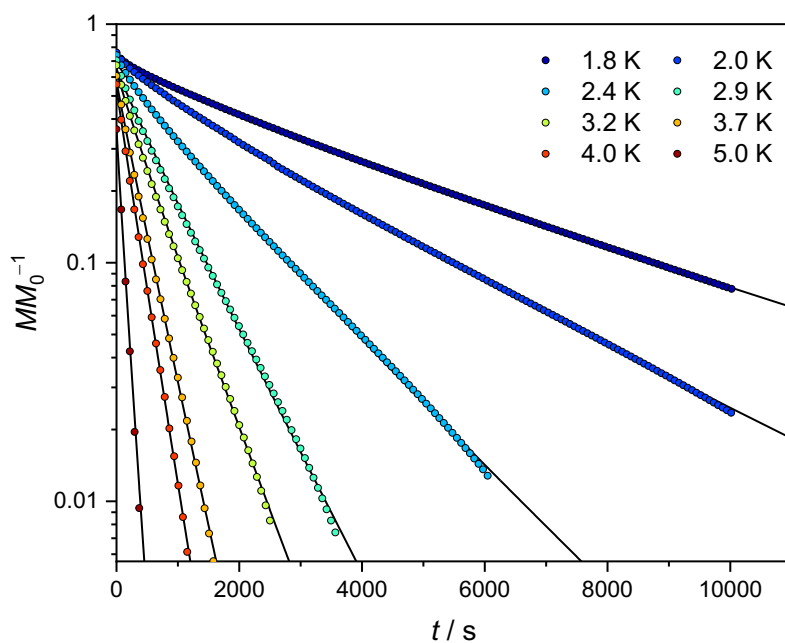

**Figure S12.** Temperature dependences of the magnetization decay for **Dy<sub>2</sub>**.

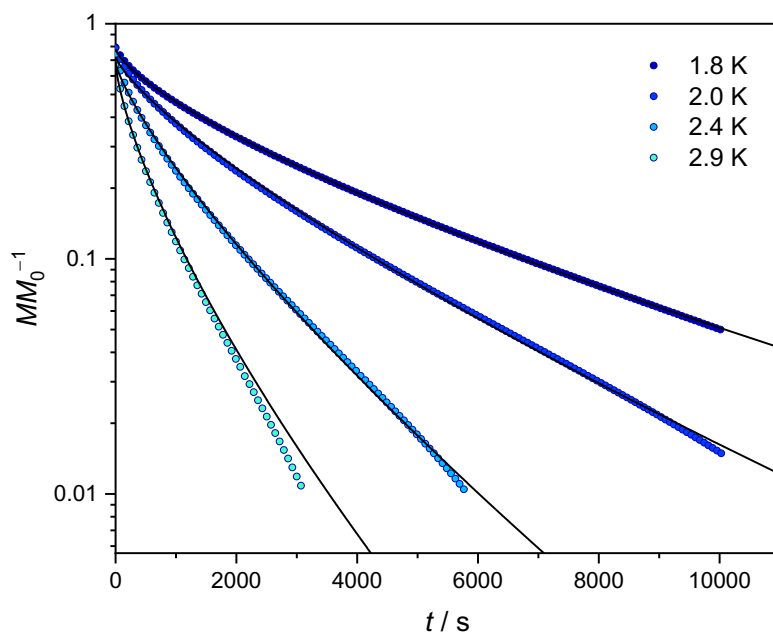

**Figure S13.** Temperature dependences of the magnetization decay for **Dy<sub>2</sub>/C<sub>60</sub>**.

**Table S1.** Optimized parameters obtained by the magnetization decay of  $\text{Dy}_2@\text{SWCNT}$  using eq. 1.

| $T / \text{K}$ | $\tau / \text{s}$ | $\text{dev}(\tau / \text{s})$ | $b$     | $\text{dev}(b)$ | $A$     | $\text{dev}(A)$ | $y_0$      | $\text{dev}(y_0)$ |
|----------------|-------------------|-------------------------------|---------|-----------------|---------|-----------------|------------|-------------------|
| 1.8            | 372.95163         | 8.98659                       | 0.51352 | 0.00428         | 0.58585 | 0.00791         | 7.20191E-4 | 1.11835E-4        |
| 2.0            | 271.63047         | 8.26446                       | 0.53259 | 0.00597         | 0.51836 | 0.00905         | 0.00159    | 1.45012E-4        |
| 2.4            | 181.70005         | 6.89077                       | 0.56199 | 0.00874         | 0.39356 | 0.00877         | 0.00274    | 1.74212E-4        |
| 2.9            | 130.80726         | 5.41162                       | 0.59715 | 0.01183         | 0.27785 | 0.00685         | 0.00378    | 1.96873E-4        |
| 3.2            | 111.78967         | 4.72607                       | 0.61382 | 0.01331         | 0.22713 | 0.00573         | 0.00404    | 1.88369E-4        |
| 3.7            | 89.34667          | 3.61247                       | 0.64572 | 0.01534         | 0.16397 | 0.00395         | 0.00454    | 1.70537E-4        |
| 4.0            | 79.37277          | 2.9907                        | 0.67189 | 0.01668         | 0.13418 | 0.003           | 0.0049     | 1.6417E-4         |
| 5.0            | 49.8655           | 2.45651                       | 0.71528 | 0.02682         | 0.06661 | 0.00164         | 0.00552    | 9.92467E-5        |

**Table S2.** Optimized parameters obtained by the magnetization decay of  $\text{Dy}_2$  using eq. 1.

| $T / \text{K}$ | $\tau / \text{s}$ | $\text{dev}(\tau / \text{s})$ | $b$     | $\text{dev}(b)$ | $A$     | $\text{dev}(A)$ | $y_0$ | $\text{dev}(y_0)$ |
|----------------|-------------------|-------------------------------|---------|-----------------|---------|-----------------|-------|-------------------|
| 1.8            | 3947.53535        | 9.64873                       | 0.86087 | 0.00366         | 0.72976 | 0.00231         | 0     | 9.95363E-4        |
| 2.0            | 2520.19471        | 17.69361                      | 0.88423 | 0.00641         | 0.72615 | 0.00476         | 0     | 5.33679E-4        |
| 2.4            | 1381.35499        | 21.29137                      | 0.92352 | 0.01252         | 0.69045 | 0.00961         | 0     | 5.91254E-4        |
| 2.9            | 759.6171          | 21.87075                      | 0.95218 | 0.02187         | 0.65026 | 0.01704         | 0     | 6.26821E-4        |
| 3.2            | 533.02812         | 14.84504                      | 0.93503 | 0.02111         | 0.6397  | 0.01591         | 0     | 6.80563E-4        |
| 3.7            | 332.81459         | 14.14842                      | 0.96688 | 0.03262         | 0.5757  | 0.02234         | 0     | 7.33598E-4        |
| 4.0            | 253.1515          | 10.00756                      | 0.9742  | 0.03228         | 0.53896 | 0.01939         | 0     | 7.76271E-4        |
| 5.0            | 99.74188          | 45.11588                      | 0.94655 | 0.39908         | 0.36611 | 0.13918         | 0     | 0.00824           |

**Table S3.** Optimized parameters obtained by the magnetization decay of  $\text{Dy}_2/\text{C}_{60}$  using eq. 1.

| $T / \text{K}$ | $\tau / \text{s}$ | $\text{dev}(\tau / \text{s})$ | $b$     | $\text{dev}(b)$ | $A$     | $\text{dev}(A)$ | $y_0$ | $\text{dev}(y_0)$ |
|----------------|-------------------|-------------------------------|---------|-----------------|---------|-----------------|-------|-------------------|
| 1.8            | 2489.1224         | 10.01265                      | 0.72233 | 0.00333         | 0.78078 | 0.00299         | 0     | 6.31149E-4        |
| 2.0            | 1772.76264        | 32.33832                      | 0.7718  | 0.01005         | 0.72557 | 0.01035         | 0     | 5.87373E-4        |
| 2.4            | 955.72603         | 26.36164                      | 0.78359 | 0.01444         | 0.68595 | 0.01479         | 0     | 6.17424E-4        |
| 2.9            | 470.54035         | 80.01058                      | 0.71515 | 0.07886         | 0.68508 | 0.08416         | 0     | 0.00458           |

**Table S4.** Optimized parameters obtained by Arrhenius fit using eq. 2.

|                                               | $U_{\text{eff}} / \text{cm}^{-1}$ | $\text{dev}(U_{\text{eff}} / \text{cm}^{-1})$ | $\tau_0 / \text{s}$ | $\text{dev}(\tau_0 / \text{s})$ |
|-----------------------------------------------|-----------------------------------|-----------------------------------------------|---------------------|---------------------------------|
| <b><math>\text{Dy}_2@\text{SWCNT}</math></b>  | 3.62606                           | 0.12203                                       | 20.60354            | 1.55231                         |
| <b><math>\text{Dy}_2</math></b>               | 6.94844                           | 0.56838                                       | 20.02469            | 8.59645                         |
| <b><math>\text{Dy}_2@\text{C}_{60}</math></b> | 4.70988                           | 0.2108                                        | 57.74542            | 9.73499                         |

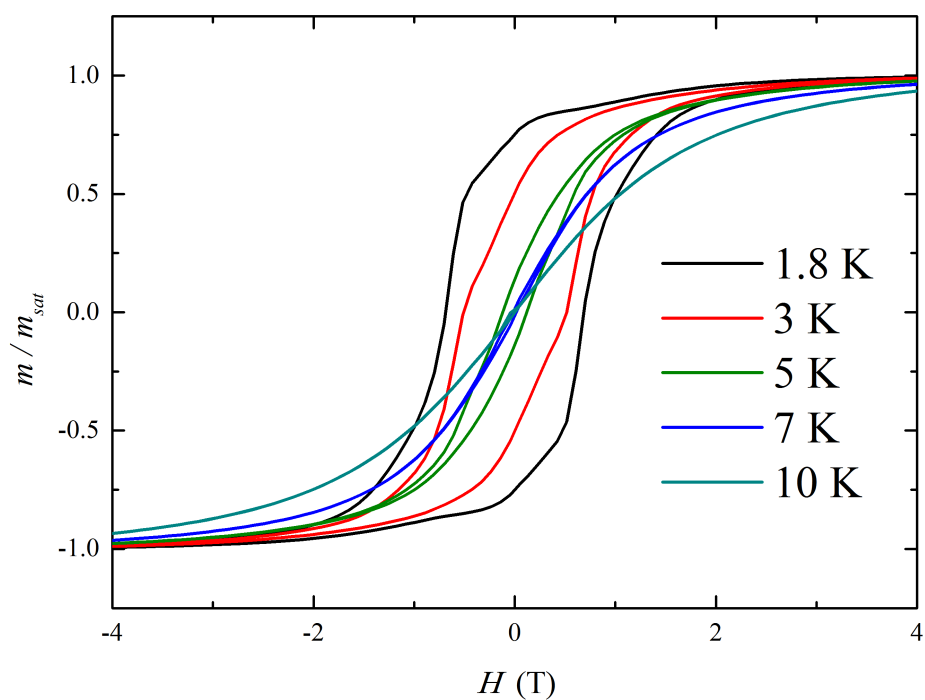

**Figure S14.**  $M$  vs.  $H$  curve for  $\text{Dy}_2/\text{C}_{60}$ .

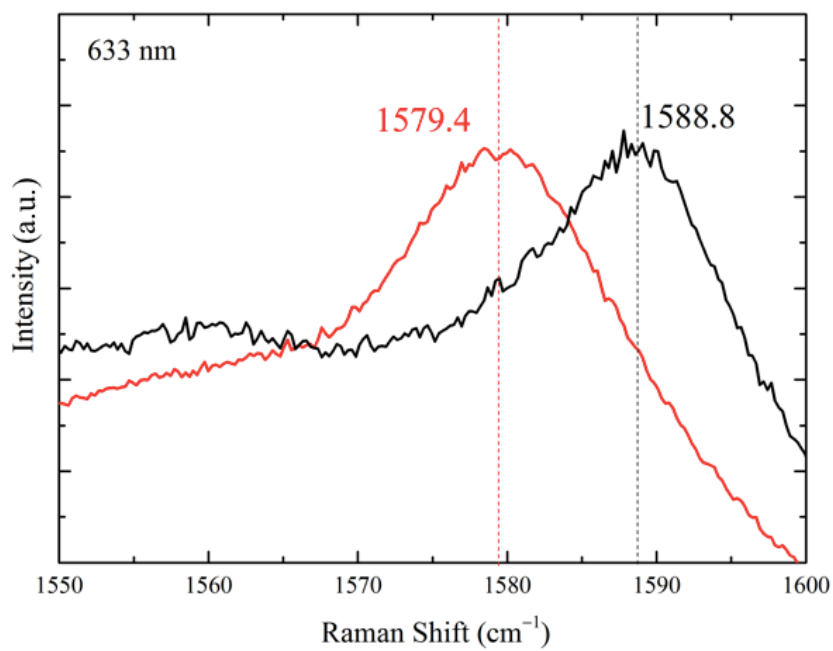

**Figure S15.** Comparison of Raman spectra between empty SWCNTs (black line) and  $\text{Dy}_2@$ SWCNT (red line) with 633 nm laser excitation.

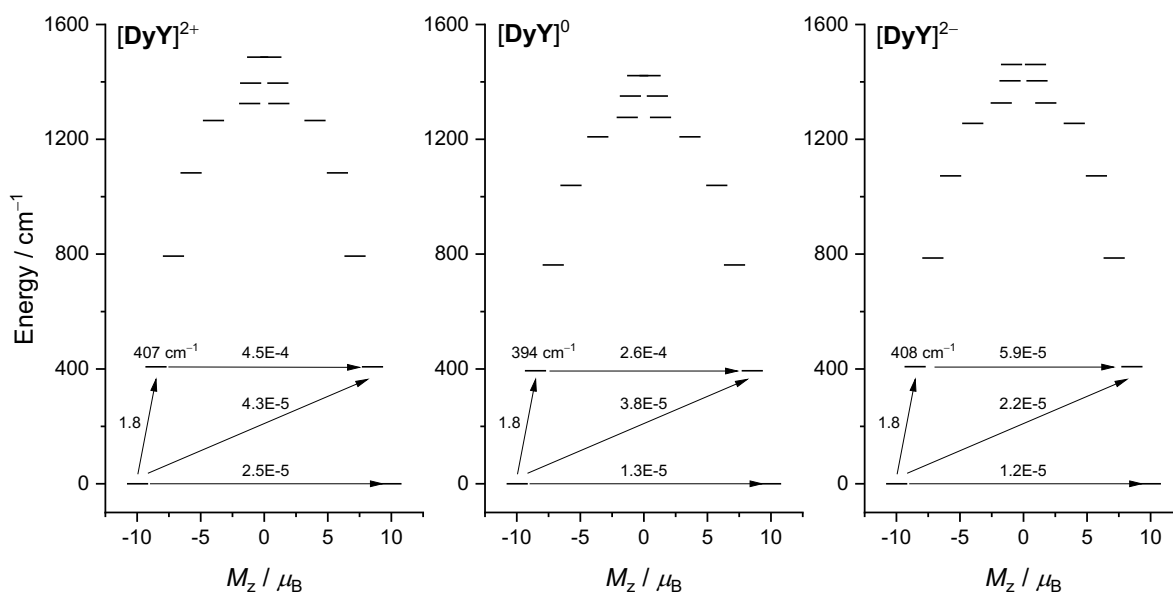

**Figure S16.** Ligand field splitting of Dy<sup>A</sup> in [DyY]<sup>2+</sup> (left), [DyY]<sup>2+</sup> (middle) and [DyY]<sup>2-</sup> (right). Energy levels of the first excited Kramer's doublets are shown for comparison. The arrows indicate the relaxation pathway with the transition magnetic moment (The unit is  $\mu_B$ ).

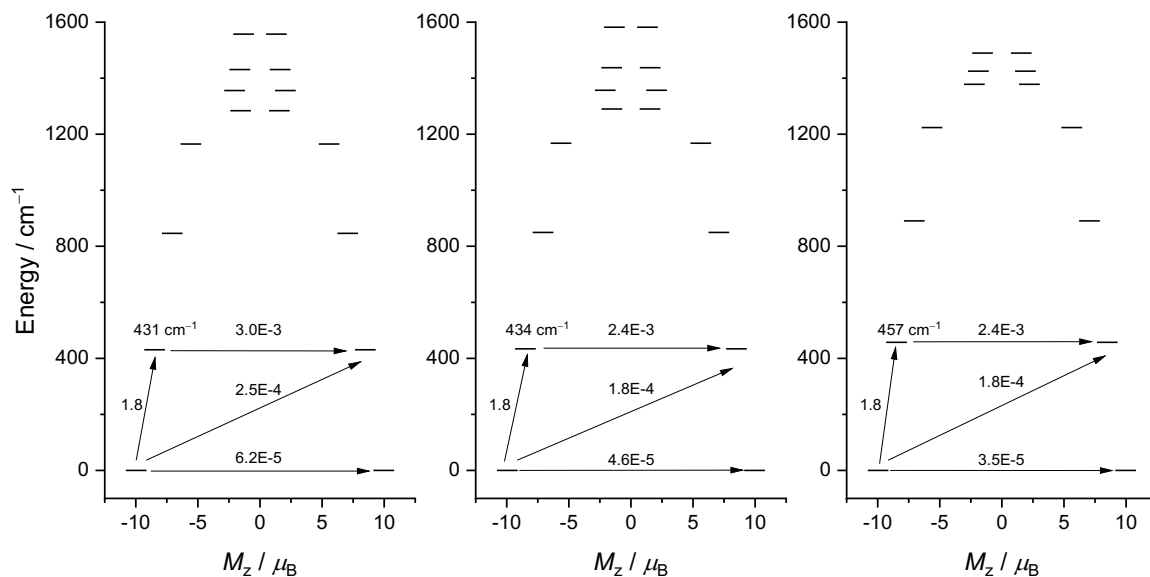

**Figure S17.** Ligand field splitting of Dy<sup>B</sup> in [DyY]<sup>2+</sup> (left), [DyY]<sup>2+</sup> (middle) and [DyY]<sup>2-</sup> (right). Energy levels of the first excited Kramer's doublets are shown for comparison. The arrows indicate the relaxation pathway with the transition magnetic moment (The unit is  $\mu_B$ ).

**Table S5.** Energy levels of the CASSCF-SO wavefunctions.

|        | Dy <sup>A</sup>     |                    |                     | Dy <sup>B</sup>     |                    |                     |
|--------|---------------------|--------------------|---------------------|---------------------|--------------------|---------------------|
|        | [DyY] <sup>2+</sup> | [DyY] <sup>0</sup> | [DyY] <sup>2-</sup> | [DyY] <sup>2+</sup> | [DyY] <sup>0</sup> | [DyY] <sup>2-</sup> |
| w.f.1  | 0                   | 0                  | 0                   | 0                   | 0                  | 0                   |
| w.f.2  | 0                   | 0                  | 0                   | 0                   | 0                  | 0                   |
| w.f.3  | 407.357             | 393.557            | 408.127             | 430.718             | 433.875            | 457.125             |
| w.f.4  | 407.357             | 393.557            | 408.127             | 430.718             | 433.875            | 457.125             |
| w.f.5  | 793.217             | 762.125            | 786.257             | 846.195             | 849.686            | 890.782             |
| w.f.6  | 793.217             | 762.125            | 786.257             | 846.195             | 849.686            | 890.782             |
| w.f.7  | 1083.193            | 1039.615           | 1072.772            | 1165.205            | 1168.096           | 1223.879            |
| w.f.8  | 1083.193            | 1039.615           | 1072.772            | 1165.205            | 1168.096           | 1223.879            |
| w.f.9  | 1265.596            | 1208.601           | 1255.573            | 1284.053            | 1290.122           | 1378.109            |
| w.f.10 | 1265.596            | 1208.601           | 1255.573            | 1284.053            | 1290.122           | 1378.109            |
| w.f.11 | 1324.572            | 1276.229           | 1326.623            | 1355.896            | 1356.801           | 1425.045            |
| w.f.12 | 1324.572            | 1276.229           | 1326.623            | 1355.896            | 1356.801           | 1425.045            |
| w.f.13 | 1395.889            | 1350.961           | 1403.669            | 1431.061            | 1437.625           | 1489.736            |
| w.f.14 | 1395.889            | 1350.961           | 1403.669            | 1431.061            | 1437.625           | 1489.736            |
| w.f.15 | 1486.520            | 1421.957           | 1460.543            | 1557.507            | 1582.146           | 1638.485            |
| w.f.16 | 1486.520            | 1421.957           | 1460.543            | 1557.507            | 1582.146           | 1638.485            |

**Table S6.** Main values of the g-tensor of the Kramers doublets (KDs) for Dy<sup>A</sup> in the series of [DyY]<sup>2+/0/2-</sup>.

|     | [DyY] <sup>2+</sup> |                |                | [DyY] <sup>0</sup> |                |                | [DyY] <sup>2-</sup> |                |                |
|-----|---------------------|----------------|----------------|--------------------|----------------|----------------|---------------------|----------------|----------------|
|     | g <sub>x</sub>      | g <sub>y</sub> | g <sub>z</sub> | g <sub>x</sub>     | g <sub>y</sub> | g <sub>z</sub> | g <sub>x</sub>      | g <sub>y</sub> | g <sub>z</sub> |
| KD1 | 6.845E-05           | 8.293E-05      | 19.926469      | 3.611E-05          | 4.419E-05      | 19.932659      | 3.329E-05           | 3.854E-05      | 19.946214      |
| KD2 | 0.0013181           | 0.0013888      | 17.095941      | 0.0007455          | 0.0008035      | 17.11013       | 0.0001691           | 0.0001834      | 17.09033       |
| KD3 | 0.0333366           | 0.0363775      | 14.308495      | 0.0251473          | 0.0297682      | 14.308567      | 0.0332485           | 0.0379379      | 14.267965      |
| KD4 | 0.2485752           | 0.3160432      | 11.57604       | 0.2368723          | 0.2909002      | 11.469098      | 0.1804834           | 0.2521148      | 11.472527      |
| KD5 | 1.7543592           | 4.0386737      | 8.2093394      | 2.9021097          | 4.8365502      | 8.5477143      | 2.5024492           | 3.561124       | 8.9913681      |
| KD6 | 1.2691556           | 4.8978767      | 12.975945      | 0.9580333          | 4.2729712      | 11.499317      | 1.7783002           | 4.8665008      | 12.694472      |
| KD7 | 1.8764655           | 2.517866       | 15.956154      | 2.0047122          | 2.3813417      | 15.410417      | 0.6081767           | 2.2006805      | 13.538614      |
| KD8 | 0.1018203           | 0.4885829      | 18.899598      | 0.2633605          | 1.0110969      | 18.61543       | 0.6530152           | 3.1222028      | 17.012736      |

**Table S7.** Main values of the g-tensor of the Kramers doublets (KDs) for Dy<sup>B</sup> in the series of [DyY]<sup>2+/0/2-</sup>.

|     | [DyY] <sup>2+</sup> |                |                | [DyY] <sup>0</sup> |                |                | [DyY] <sup>2-</sup> |                |                |
|-----|---------------------|----------------|----------------|--------------------|----------------|----------------|---------------------|----------------|----------------|
|     | g <sub>x</sub>      | g <sub>y</sub> | g <sub>z</sub> | g <sub>x</sub>     | g <sub>y</sub> | g <sub>z</sub> | g <sub>x</sub>      | g <sub>y</sub> | g <sub>z</sub> |
| KD1 | 0.0001763           | 0.000197       | 19.925174      | 0.0001289          | 0.0001483      | 19.921822      | 9.165E-05           | 0.0001187      | 19.927141      |
| KD2 | 0.0086971           | 0.0090359      | 17.017433      | 0.0071543          | 0.007312       | 17.002509      | 0.0069889           | 0.0071963      | 16.99143       |
| KD3 | 0.1010042           | 0.1087714      | 14.167513      | 0.0812747          | 0.0893273      | 14.179722      | 0.0982988           | 0.1087306      | 14.149688      |
| KD4 | 0.6257483           | 0.9261182      | 11.222221      | 0.3761152          | 0.55314        | 11.326055      | 0.598152            | 0.7703649      | 11.282266      |
| KD5 | 2.0100559           | 3.5819115      | 15.20295       | 2.4464126          | 3.7205067      | 15.069545      | 2.5201553           | 4.7657592      | 11.795063      |
| KD6 | 1.8919385           | 4.5704295      | 10.680621      | 1.5514779          | 4.0948667      | 10.731896      | 0.5962332           | 2.2197962      | 10.561054      |
| KD7 | 1.1180533           | 2.1428579      | 16.041707      | 0.9812141          | 1.9837221      | 15.930153      | 1.1144005           | 2.6166358      | 15.440749      |
| KD8 | 0.1806188           | 0.6162918      | 19.015572      | 0.1495314          | 0.4979378      | 19.089629      | 0.0650801           | 0.3867962      | 18.987874      |

**Table S8.** Weights of  $M_J$  components (in %) in the wavefunction of the  $J = 15/2$  ground state for  $\text{Dy}^{\text{A}}$  in  $[\text{DyY}]^{2+}$ .

| $M_J$ | w.f. 1 | w.f. 2 | w.f. 3 | w.f. 4 | w.f. 5 | w.f. 6 | w.f. 7 | w.f. 8 | w.f. 9 | w.f. 10 | w.f. 11 | w.f. 12 | w.f. 13 | w.f. 14 | w.f. 15 | w.f. 16 |
|-------|--------|--------|--------|--------|--------|--------|--------|--------|--------|---------|---------|---------|---------|---------|---------|---------|
| -7.5  | 86.5   | 12.6   | 0.0    | 0.0    | 0.8    | 0.0    | 0.0    | 0.0    | 0.0    | 0.0     | 0.0     | 0.0     | 0.0     | 0.0     | 0.0     | 0.0     |
| -6.5  | 0.0    | 0.0    | 92.3   | 6.2    | 0.9    | 0.0    | 0.4    | 0.0    | 0.0    | 0.0     | 0.0     | 0.1     | 0.1     | 0.0     | 0.0     | 0.0     |
| -5.5  | 0.7    | 0.1    | 0.7    | 0.0    | 95.8   | 0.0    | 2.2    | 0.0    | 0.1    | 0.0     | 0.0     | 0.1     | 0.1     | 0.0     | 0.0     | 0.0     |
| -4.5  | 0.0    | 0.0    | 0.5    | 0.0    | 2.2    | 0.0    | 92.3   | 0.1    | 1.9    | 0.3     | 0.6     | 0.9     | 0.3     | 0.5     | 0.1     | 0.2     |
| -3.5  | 0.0    | 0.0    | 0.0    | 0.0    | 0.0    | 0.0    | 3.1    | 0.0    | 71.3   | 10.3    | 5.2     | 4.2     | 4.6     | 0.1     | 0.2     | 0.9     |
| -2.5  | 0.0    | 0.0    | 0.1    | 0.0    | 0.0    | 0.0    | 1.4    | 0.0    | 0.5    | 0.7     | 23.2    | 19.1    | 13.3    | 30.9    | 6.2     | 4.5     |
| -1.5  | 0.0    | 0.0    | 0.0    | 0.0    | 0.1    | 0.0    | 0.3    | 0.1    | 7.1    | 1.5     | 11.8    | 7.5     | 32.4    | 0.9     | 34.3    | 3.8     |
| -0.5  | 0.0    | 0.0    | 0.0    | 0.0    | 0.1    | 0.0    | 0.0    | 0.1    | 4.3    | 1.8     | 16.2    | 11.1    | 1.5     | 15.2    | 15.4    | 34.3    |
| 0.5   | 0.0    | 0.0    | 0.0    | 0.0    | 0.0    | 0.1    | 0.1    | 0.0    | 1.8    | 4.3     | 11.1    | 16.2    | 15.2    | 1.5     | 34.3    | 15.4    |
| 1.5   | 0.0    | 0.0    | 0.0    | 0.0    | 0.0    | 0.1    | 0.1    | 0.3    | 1.5    | 7.1     | 7.5     | 11.8    | 0.9     | 32.4    | 3.8     | 34.3    |
| 2.5   | 0.0    | 0.0    | 0.0    | 0.1    | 0.0    | 0.0    | 0.0    | 1.4    | 0.7    | 0.5     | 19.1    | 23.2    | 30.9    | 13.3    | 4.5     | 6.2     |
| 3.5   | 0.0    | 0.0    | 0.0    | 0.0    | 0.0    | 0.0    | 0.0    | 3.1    | 10.3   | 71.3    | 4.2     | 5.2     | 0.1     | 4.6     | 0.9     | 0.2     |
| 4.5   | 0.0    | 0.0    | 0.0    | 0.5    | 0.0    | 2.2    | 0.1    | 92.3   | 0.3    | 1.9     | 0.9     | 0.6     | 0.5     | 0.3     | 0.2     | 0.1     |
| 5.5   | 0.1    | 0.7    | 0.0    | 0.7    | 0.0    | 95.8   | 0.0    | 2.2    | 0.0    | 0.1     | 0.1     | 0.0     | 0.0     | 0.1     | 0.0     | 0.0     |
| 6.5   | 0.0    | 0.0    | 6.2    | 92.3   | 0.0    | 0.9    | 0.0    | 0.4    | 0.0    | 0.0     | 0.1     | 0.0     | 0.0     | 0.1     | 0.0     | 0.0     |
| 7.5   | 12.6   | 86.5   | 0.0    | 0.0    | 0.0    | 0.8    | 0.0    | 0.0    | 0.0    | 0.0     | 0.0     | 0.0     | 0.0     | 0.0     | 0.0     | 0.0     |

**Table S9.** Weights of  $M_J$  components (in %) in the wavefunction of the  $J = 15/2$  ground state for  $\text{Dy}^{\text{A}}$  in  $[\text{DyY}]^0$ .

| $M_J$ | w.f. 1 | w.f. 2 | w.f. 3 | w.f. 4 | w.f. 5 | w.f. 6 | w.f. 7 | w.f. 8 | w.f. 9 | w.f. 10 | w.f. 11 | w.f. 12 | w.f. 13 | w.f. 14 | w.f. 15 | w.f. 16 |
|-------|--------|--------|--------|--------|--------|--------|--------|--------|--------|---------|---------|---------|---------|---------|---------|---------|
| -7.5  | 57.0   | 42.2   | 0.0    | 0.0    | 0.6    | 0.1    | 0.0    | 0.0    | 0.0    | 0.0     | 0.0     | 0.0     | 0.0     | 0.0     | 0.0     | 0.0     |
| -6.5  | 0.0    | 0.0    | 93.2   | 5.5    | 0.7    | 0.1    | 0.3    | 0.0    | 0.0    | 0.0     | 0.0     | 0.1     | 0.1     | 0.0     | 0.0     | 0.0     |
| -5.5  | 0.4    | 0.3    | 0.7    | 0.0    | 84.7   | 11.0   | 2.1    | 0.0    | 0.3    | 0.1     | 0.0     | 0.1     | 0.0     | 0.1     | 0.0     | 0.1     |
| -4.5  | 0.0    | 0.0    | 0.3    | 0.0    | 2.1    | 0.3    | 90.9   | 0.6    | 1.3    | 0.6     | 0.6     | 1.8     | 0.4     | 0.6     | 0.3     | 0.1     |
| -3.5  | 0.0    | 0.0    | 0.1    | 0.0    | 0.2    | 0.0    | 2.8    | 0.1    | 69.6   | 3.1     | 13.6    | 4.4     | 0.6     | 4.3     | 0.8     | 0.5     |
| -2.5  | 0.0    | 0.0    | 0.1    | 0.0    | 0.0    | 0.0    | 2.7    | 0.0    | 0.6    | 2.1     | 22.4    | 17.9    | 35.0    | 9.9     | 6.0     | 3.3     |
| -1.5  | 0.0    | 0.0    | 0.0    | 0.0    | 0.1    | 0.0    | 0.1    | 0.0    | 14.2   | 0.3     | 7.0     | 6.8     | 5.1     | 26.9    | 1.0     | 38.5    |
| -0.5  | 0.0    | 0.0    | 0.0    | 0.0    | 0.1    | 0.0    | 0.0    | 0.3    | 1.8    | 5.9     | 19.2    | 6.1     | 9.1     | 8.0     | 40.2    | 9.2     |
| 0.5   | 0.0    | 0.0    | 0.0    | 0.0    | 0.0    | 0.1    | 0.3    | 0.0    | 5.9    | 1.8     | 6.1     | 19.2    | 8.0     | 9.1     | 9.2     | 40.2    |
| 1.5   | 0.0    | 0.0    | 0.0    | 0.0    | 0.0    | 0.1    | 0.0    | 0.1    | 0.3    | 14.2    | 6.8     | 7.0     | 26.9    | 5.1     | 38.5    | 1.0     |
| 2.5   | 0.0    | 0.0    | 0.0    | 0.1    | 0.0    | 0.0    | 0.0    | 2.7    | 2.1    | 0.6     | 17.9    | 22.4    | 9.9     | 35.0    | 3.3     | 6.0     |
| 3.5   | 0.0    | 0.0    | 0.0    | 0.1    | 0.0    | 0.2    | 0.1    | 2.8    | 3.1    | 69.6    | 4.4     | 13.6    | 4.3     | 0.6     | 0.5     | 0.8     |
| 4.5   | 0.0    | 0.0    | 0.0    | 0.3    | 0.3    | 2.1    | 0.6    | 90.9   | 0.6    | 1.3     | 1.8     | 0.6     | 0.6     | 0.4     | 0.1     | 0.3     |
| 5.5   | 0.3    | 0.4    | 0.0    | 0.7    | 11.0   | 84.7   | 0.0    | 2.1    | 0.1    | 0.3     | 0.1     | 0.0     | 0.1     | 0.0     | 0.1     | 0.0     |
| 6.5   | 0.0    | 0.0    | 5.5    | 93.2   | 0.1    | 0.7    | 0.0    | 0.3    | 0.0    | 0.0     | 0.0     | 0.0     | 0.0     | 0.1     | 0.0     | 0.0     |
| 7.5   | 42.2   | 57.0   | 0.0    | 0.0    | 0.1    | 0.6    | 0.0    | 0.0    | 0.0    | 0.0     | 0.0     | 0.0     | 0.0     | 0.0     | 0.0     | 0.0     |

**Table S10.** Weights of  $M_J$  components (in %) in the wavefunction of the  $J = 15/2$  ground state for  $\text{Dy}^{\text{A}}$  in  $[\text{DyY}]^{2-}$ .

| $M_J$ | w.f. 1 | w.f. 2 | w.f. 3 | w.f. 4 | w.f. 5 | w.f. 6 | w.f. 7 | w.f. 8 | w.f. 9 | w.f. 10 | w.f. 11 | w.f. 12 | w.f. 13 | w.f. 14 | w.f. 15 | w.f. 16 |
|-------|--------|--------|--------|--------|--------|--------|--------|--------|--------|---------|---------|---------|---------|---------|---------|---------|
| -7.5  | 99.5   | 0.0    | 0.0    | 0.0    | 0.5    | 0.0    | 0.0    | 0.0    | 0.0    | 0.0     | 0.0     | 0.0     | 0.0     | 0.0     | 0.0     | 0.0     |
| -6.5  | 0.0    | 0.0    | 99.2   | 0.1    | 0.4    | 0.0    | 0.1    | 0.0    | 0.0    | 0.0     | 0.0     | 0.0     | 0.1     | 0.0     | 0.0     | 0.0     |
| -5.5  | 0.0    | 0.0    | 0.4    | 0.0    | 97.5   | 0.0    | 0.8    | 0.1    | 0.3    | 0.1     | 0.0     | 0.0     | 0.0     | 0.0     | 0.1     | 0.1     |
| -4.5  | 0.0    | 0.0    | 0.2    | 0.0    | 1.0    | 0.0    | 85.5   | 9.1    | 1.0    | 0.2     | 1.1     | 0.5     | 0.6     | 0.1     | 0.0     | 0.5     |
| -3.5  | 0.0    | 0.0    | 0.1    | 0.0    | 0.4    | 0.0    | 0.9    | 0.1    | 59.1   | 23.0    | 8.1     | 2.8     | 1.8     | 2.1     | 1.1     | 0.5     |
| -2.5  | 0.0    | 0.0    | 0.1    | 0.0    | 0.0    | 0.0    | 2.8    | 0.3    | 2.3    | 0.4     | 33.3    | 8.5     | 35.8    | 6.3     | 0.0     | 10.1    |
| -1.5  | 0.0    | 0.0    | 0.0    | 0.0    | 0.1    | 0.0    | 0.0    | 0.0    | 6.3    | 3.6     | 18.5    | 4.8     | 0.3     | 21.0    | 16.8    | 28.5    |
| -0.5  | 0.0    | 0.0    | 0.0    | 0.0    | 0.1    | 0.0    | 0.0    | 0.2    | 0.8    | 2.7     | 18.6    | 3.7     | 10.6    | 21.1    | 26.1    | 16.1    |
| 0.5   | 0.0    | 0.0    | 0.0    | 0.0    | 0.0    | 0.1    | 0.2    | 0.0    | 2.7    | 0.8     | 3.7     | 18.6    | 21.1    | 10.6    | 16.1    | 26.1    |
| 1.5   | 0.0    | 0.0    | 0.0    | 0.0    | 0.0    | 0.1    | 0.0    | 0.0    | 3.6    | 6.3     | 4.8     | 18.5    | 21.0    | 0.3     | 28.5    | 16.8    |
| 2.5   | 0.0    | 0.0    | 0.0    | 0.1    | 0.0    | 0.0    | 0.3    | 2.8    | 0.4    | 2.3     | 8.5     | 33.3    | 6.3     | 35.8    | 10.1    | 0.0     |
| 3.5   | 0.0    | 0.0    | 0.0    | 0.1    | 0.0    | 0.4    | 0.1    | 0.9    | 23.0   | 59.1    | 2.8     | 8.1     | 2.1     | 1.8     | 0.5     | 1.1     |
| 4.5   | 0.0    | 0.0    | 0.0    | 0.2    | 0.0    | 1.0    | 9.1    | 85.5   | 0.2    | 1.0     | 0.5     | 1.1     | 0.1     | 0.6     | 0.5     | 0.0     |
| 5.5   | 0.0    | 0.0    | 0.0    | 0.4    | 0.0    | 97.5   | 0.1    | 0.8    | 0.1    | 0.3     | 0.0     | 0.0     | 0.0     | 0.0     | 0.1     | 0.1     |
| 6.5   | 0.0    | 0.0    | 0.1    | 99.2   | 0.0    | 0.4    | 0.0    | 0.1    | 0.0    | 0.0     | 0.0     | 0.0     | 0.0     | 0.1     | 0.0     | 0.0     |
| 7.5   | 0.0    | 99.5   | 0.0    | 0.0    | 0.0    | 0.5    | 0.0    | 0.0    | 0.0    | 0.0     | 0.0     | 0.0     | 0.0     | 0.0     | 0.0     | 0.0     |

**Table S11.** Weights of  $M_J$  components (in %) in the wavefunction of the  $J = 15/2$  ground state for  $\text{Dy}^{\text{B}}$  in  $[\text{DyY}]^{2+}$ .

| $M_J$ | w.f. 1 | w.f. 2 | w.f. 3 | w.f. 4 | w.f. 5 | w.f. 6 | w.f. 7 | w.f. 8 | w.f. 9 | w.f. 10 | w.f. 11 | w.f. 12 | w.f. 13 | w.f. 14 | w.f. 15 | w.f. 16 |
|-------|--------|--------|--------|--------|--------|--------|--------|--------|--------|---------|---------|---------|---------|---------|---------|---------|
| -7.5  | 99.2   | 0.1    | 0.0    | 0.0    | 0.2    | 0.1    | 0.3    | 0.0    | 0.0    | 0.0     | 0.0     | 0.0     | 0.0     | 0.0     | 0.0     | 0.0     |
| -6.5  | 0.0    | 0.0    | 98.1   | 0.1    | 0.4    | 0.3    | 0.5    | 0.0    | 0.0    | 0.1     | 0.3     | 0.1     | 0.0     | 0.0     | 0.1     | 0.0     |
| -5.5  | 0.4    | 0.0    | 0.6    | 0.0    | 54.2   | 41.6   | 1.5    | 0.0    | 0.1    | 0.4     | 0.6     | 0.3     | 0.1     | 0.0     | 0.0     | 0.1     |
| -4.5  | 0.3    | 0.0    | 0.6    | 0.0    | 1.1    | 0.7    | 87.6   | 0.9    | 0.7    | 2.4     | 1.4     | 2.0     | 1.5     | 0.2     | 0.5     | 0.1     |
| -3.5  | 0.0    | 0.0    | 0.5    | 0.0    | 0.4    | 0.3    | 2.5    | 0.1    | 7.6    | 15.5    | 35.7    | 19.3    | 2.0     | 9.0     | 4.8     | 2.2     |
| -2.5  | 0.0    | 0.0    | 0.1    | 0.0    | 0.1    | 0.1    | 3.5    | 0.1    | 8.2    | 3.1     | 7.6     | 10.6    | 44.9    | 0.0     | 9.7     | 11.9    |
| -1.5  | 0.0    | 0.0    | 0.0    | 0.0    | 0.1    | 0.1    | 1.3    | 0.1    | 0.4    | 26.7    | 2.6     | 4.0     | 17.1    | 15.3    | 30.2    | 2.0     |
| -0.5  | 0.0    | 0.0    | 0.0    | 0.0    | 0.2    | 0.1    | 0.6    | 1.1    | 31.1   | 3.5     | 8.5     | 6.8     | 6.5     | 3.1     | 4.7     | 33.8    |
| 0.5   | 0.0    | 0.0    | 0.0    | 0.0    | 0.1    | 0.2    | 1.1    | 0.6    | 3.5    | 31.1    | 6.8     | 8.5     | 3.1     | 6.5     | 33.8    | 4.7     |
| 1.5   | 0.0    | 0.0    | 0.0    | 0.0    | 0.1    | 0.1    | 0.1    | 1.3    | 26.7   | 0.4     | 4.0     | 2.6     | 15.3    | 17.1    | 2.0     | 30.2    |
| 2.5   | 0.0    | 0.0    | 0.0    | 0.1    | 0.1    | 0.1    | 0.1    | 3.5    | 3.1    | 8.2     | 10.6    | 7.6     | 0.0     | 44.9    | 11.9    | 9.7     |
| 3.5   | 0.0    | 0.0    | 0.0    | 0.5    | 0.3    | 0.4    | 0.1    | 2.5    | 15.5   | 7.6     | 19.3    | 35.7    | 9.0     | 2.0     | 2.2     | 4.8     |
| 4.5   | 0.0    | 0.3    | 0.0    | 0.6    | 0.7    | 1.1    | 0.9    | 87.6   | 2.4    | 0.7     | 2.0     | 1.4     | 0.2     | 1.5     | 0.1     | 0.5     |
| 5.5   | 0.0    | 0.4    | 0.0    | 0.6    | 41.6   | 54.2   | 0.0    | 1.5    | 0.4    | 0.1     | 0.3     | 0.6     | 0.0     | 0.1     | 0.1     | 0.0     |
| 6.5   | 0.0    | 0.0    | 0.1    | 98.1   | 0.3    | 0.4    | 0.0    | 0.5    | 0.1    | 0.0     | 0.1     | 0.3     | 0.0     | 0.0     | 0.0     | 0.1     |
| 7.5   | 0.1    | 99.2   | 0.0    | 0.0    | 0.1    | 0.2    | 0.0    | 0.3    | 0.0    | 0.0     | 0.0     | 0.0     | 0.0     | 0.0     | 0.0     | 0.0     |

**Table S12.** Weights of  $M_J$  components (in %) in the wavefunction of the  $J = 15/2$  ground state for  $\text{Dy}^{\text{B}}$  in  $[\text{DyY}]^0$ .

| $M_J$ | w.f. 1 | w.f. 2 | w.f. 3 | w.f. 4 | w.f. 5 | w.f. 6 | w.f. 7 | w.f. 8 | w.f. 9 | w.f. 10 | w.f. 11 | w.f. 12 | w.f. 13 | w.f. 14 | w.f. 15 | w.f. 16 |
|-------|--------|--------|--------|--------|--------|--------|--------|--------|--------|---------|---------|---------|---------|---------|---------|---------|
| -7.5  | 99.3   | 0.0    | 0.0    | 0.0    | 0.3    | 0.0    | 0.3    | 0.0    | 0.0    | 0.0     | 0.0     | 0.0     | 0.0     | 0.0     | 0.0     | 0.0     |
| -6.5  | 0.0    | 0.0    | 64.0   | 34.5   | 0.3    | 0.0    | 0.5    | 0.0    | 0.1    | 0.1     | 0.4     | 0.0     | 0.1     | 0.0     | 0.0     | 0.0     |
| -5.5  | 0.4    | 0.0    | 0.2    | 0.1    | 97.0   | 0.1    | 0.7    | 0.0    | 0.2    | 0.2     | 0.9     | 0.0     | 0.1     | 0.0     | 0.1     | 0.0     |
| -4.5  | 0.3    | 0.0    | 0.4    | 0.2    | 1.1    | 0.0    | 89.4   | 2.2    | 0.0    | 2.0     | 1.8     | 0.9     | 0.6     | 0.7     | 0.3     | 0.3     |
| -3.5  | 0.0    | 0.0    | 0.3    | 0.2    | 0.7    | 0.0    | 1.5    | 0.1    | 15.3   | 9.9     | 49.0    | 5.3     | 9.3     | 1.9     | 3.4     | 3.2     |
| -2.5  | 0.0    | 0.0    | 0.1    | 0.0    | 0.2    | 0.0    | 2.8    | 0.1    | 6.0    | 5.0     | 8.7     | 12.1    | 22.0    | 22.3    | 17.8    | 2.8     |
| -1.5  | 0.0    | 0.0    | 0.0    | 0.0    | 0.2    | 0.0    | 1.2    | 0.2    | 5.0    | 20.3    | 2.1     | 4.4     | 29.9    | 5.2     | 14.2    | 17.2    |
| -0.5  | 0.0    | 0.0    | 0.0    | 0.0    | 0.1    | 0.0    | 0.5    | 0.6    | 26.9   | 9.0     | 8.6     | 5.7     | 4.8     | 3.2     | 29.8    | 10.8    |
| 0.5   | 0.0    | 0.0    | 0.0    | 0.0    | 0.0    | 0.1    | 0.6    | 0.5    | 9.0    | 26.9    | 5.7     | 8.6     | 3.2     | 4.8     | 10.8    | 29.8    |
| 1.5   | 0.0    | 0.0    | 0.0    | 0.0    | 0.0    | 0.2    | 0.2    | 1.2    | 20.3   | 5.0     | 4.4     | 2.1     | 5.2     | 29.9    | 17.2    | 14.2    |
| 2.5   | 0.0    | 0.0    | 0.0    | 0.1    | 0.0    | 0.2    | 0.1    | 2.8    | 5.0    | 6.0     | 12.1    | 8.7     | 22.3    | 22.0    | 2.8     | 17.8    |
| 3.5   | 0.0    | 0.0    | 0.2    | 0.3    | 0.0    | 0.7    | 0.1    | 1.5    | 9.9    | 15.3    | 5.3     | 49.0    | 1.9     | 9.3     | 3.2     | 3.4     |
| 4.5   | 0.0    | 0.3    | 0.2    | 0.4    | 0.0    | 1.1    | 2.2    | 89.4   | 2.0    | 0.0     | 0.9     | 1.8     | 0.7     | 0.6     | 0.3     | 0.3     |
| 5.5   | 0.0    | 0.4    | 0.1    | 0.2    | 0.1    | 97.0   | 0.0    | 0.7    | 0.2    | 0.2     | 0.0     | 0.9     | 0.0     | 0.1     | 0.0     | 0.1     |
| 6.5   | 0.0    | 0.0    | 34.5   | 64.0   | 0.0    | 0.3    | 0.0    | 0.5    | 0.1    | 0.1     | 0.0     | 0.4     | 0.0     | 0.1     | 0.0     | 0.0     |
| 7.5   | 0.0    | 99.3   | 0.0    | 0.0    | 0.0    | 0.3    | 0.0    | 0.3    | 0.0    | 0.0     | 0.0     | 0.0     | 0.0     | 0.0     | 0.0     | 0.0     |

**Table S13.** Weights of  $M_J$  components (in %) in the wavefunction of the  $J = 15/2$  ground state for  $\text{Dy}^{\text{B}}$  in  $[\text{DyY}]^{2-}$ .

| $M_J$ | w.f. 1 | w.f. 2 | w.f. 3 | w.f. 4 | w.f. 5 | w.f. 6 | w.f. 7 | w.f. 8 | w.f. 9 | w.f. 10 | w.f. 11 | w.f. 12 | w.f. 13 | w.f. 14 | w.f. 15 | w.f. 16 |
|-------|--------|--------|--------|--------|--------|--------|--------|--------|--------|---------|---------|---------|---------|---------|---------|---------|
| -7.5  | 99.3   | 0.1    | 0.0    | 0.0    | 0.3    | 0.0    | 0.3    | 0.0    | 0.0    | 0.0     | 0.0     | 0.0     | 0.0     | 0.0     | 0.0     | 0.0     |
| -6.5  | 0.0    | 0.0    | 2.1    | 96.4   | 0.2    | 0.0    | 0.5    | 0.0    | 0.1    | 0.1     | 0.3     | 0.0     | 0.0     | 0.0     | 0.0     | 0.0     |
| -5.5  | 0.4    | 0.0    | 0.0    | 0.3    | 96.7   | 0.2    | 0.9    | 0.0    | 0.5    | 0.1     | 0.7     | 0.0     | 0.1     | 0.0     | 0.0     | 0.0     |
| -4.5  | 0.2    | 0.0    | 0.0    | 0.5    | 1.2    | 0.0    | 92.0   | 0.1    | 1.2    | 0.3     | 1.9     | 0.6     | 0.1     | 1.0     | 0.0     | 0.7     |
| -3.5  | 0.0    | 0.0    | 0.0    | 0.4    | 0.7    | 0.0    | 1.7    | 0.0    | 26.3   | 13.1    | 38.1    | 3.9     | 5.9     | 2.1     | 6.4     | 1.3     |
| -2.5  | 0.0    | 0.0    | 0.0    | 0.1    | 0.2    | 0.0    | 2.2    | 0.0    | 6.6    | 0.4     | 15.4    | 8.6     | 17.1    | 26.5    | 11.5    | 11.3    |
| -1.5  | 0.0    | 0.0    | 0.0    | 0.0    | 0.2    | 0.0    | 1.1    | 0.2    | 9.2    | 11.9    | 1.8     | 7.2     | 34.8    | 2.1     | 8.1     | 23.4    |
| -0.5  | 0.0    | 0.0    | 0.0    | 0.0    | 0.2    | 0.0    | 0.3    | 0.7    | 26.7   | 3.3     | 15.6    | 5.7     | 9.1     | 1.2     | 35.4    | 1.7     |
| 0.5   | 0.0    | 0.0    | 0.0    | 0.0    | 0.0    | 0.2    | 0.7    | 0.3    | 3.3    | 26.7    | 5.7     | 15.6    | 1.2     | 9.1     | 1.7     | 35.4    |
| 1.5   | 0.0    | 0.0    | 0.0    | 0.0    | 0.0    | 0.2    | 0.2    | 1.1    | 11.9   | 9.2     | 7.2     | 1.8     | 2.1     | 34.8    | 23.4    | 8.1     |
| 2.5   | 0.0    | 0.0    | 0.1    | 0.0    | 0.0    | 0.2    | 0.0    | 2.2    | 0.4    | 6.6     | 8.6     | 15.4    | 26.5    | 17.1    | 11.3    | 11.5    |
| 3.5   | 0.0    | 0.0    | 0.4    | 0.0    | 0.0    | 0.7    | 0.0    | 1.7    | 13.1   | 26.3    | 3.9     | 38.1    | 2.1     | 5.9     | 1.3     | 6.4     |
| 4.5   | 0.0    | 0.2    | 0.5    | 0.0    | 0.0    | 1.2    | 0.1    | 92.0   | 0.3    | 1.2     | 0.6     | 1.9     | 1.0     | 0.1     | 0.7     | 0.0     |
| 5.5   | 0.0    | 0.4    | 0.3    | 0.0    | 0.2    | 96.7   | 0.0    | 0.9    | 0.1    | 0.5     | 0.0     | 0.7     | 0.0     | 0.1     | 0.0     | 0.0     |
| 6.5   | 0.0    | 0.0    | 96.4   | 2.1    | 0.0    | 0.2    | 0.0    | 0.5    | 0.1    | 0.1     | 0.0     | 0.3     | 0.0     | 0.0     | 0.0     | 0.0     |
| 7.5   | 0.1    | 99.3   | 0.0    | 0.0    | 0.0    | 0.3    | 0.0    | 0.3    | 0.0    | 0.0     | 0.0     | 0.0     | 0.0     | 0.0     | 0.0     | 0.0     |

**Table S14.** Mulliken atomic charges of  $[\text{DyY}]^{2+/0/2-}$  with  $\text{Dy}^{\text{A}}$  atom.

|                        | Coordinate / Å |          |          | Mulliken atomic charges / e |          |          |
|------------------------|----------------|----------|----------|-----------------------------|----------|----------|
|                        | x              | y        | z        | cation                      | neutral  | anion    |
| $\text{Dy}^{\text{A}}$ | 0              | 0        | 2.07902  | 1.685841                    | 1.646197 | 1.55747  |
| Y                      | -0.85262       | 1.34723  | -1.14697 | 1.362022                    | 1.390006 | 1.394089 |
| S                      | 0.5705         | -1.57826 | -1.01142 | 1.036028                    | 1.0112   | 0.954502 |
| N                      | 0              | 0        | 0        | -2.29299                    | -2.26614 | -2.25072 |
| C                      | 0.483          | -0.24695 | -3.88475 | -0.07499                    | -0.06973 | -0.08933 |
| C                      | -0.98334       | -0.36067 | -3.82554 | 0.009524                    | -0.0249  | -0.04223 |
| C                      | -1.35453       | -1.67069 | -3.37713 | 0.051869                    | 0.038555 | -0.00062 |
| C                      | -0.1167        | -2.43156 | -3.18612 | -0.05049                    | -0.07053 | -0.06381 |
| C                      | 0.9817         | -1.59206 | -3.50784 | -0.04136                    | -0.07935 | -0.09935 |
| C                      | 2.27425        | -1.70251 | -2.87012 | 0.009201                    | 0.003774 | -0.1339  |
| C                      | 2.41253        | -2.81591 | -1.91509 | 0.025704                    | -0.00023 | 0.007998 |
| C                      | 1.29996        | -3.62713 | -1.54303 | 0.076813                    | 0.056196 | 0.028953 |
| C                      | -0.02641       | -3.43874 | -2.16083 | 0.015077                    | -0.0032  | -0.14812 |
| C                      | -1.18543       | -3.63066 | -1.35873 | -0.02856                    | -0.07475 | -0.0042  |
| C                      | -1.09516       | -3.927   | 0.04888  | -0.05685                    | -0.07176 | -0.15139 |
| C                      | 0.1628         | -3.97712 | 0.71792  | 0.062503                    | 0.060686 | 0.06166  |
| C                      | 1.32615        | -3.83804 | -0.11057 | -0.05429                    | -0.08223 | -0.09787 |
| C                      | 2.46817        | -3.16953 | 0.44435  | -0.0886                     | -0.08811 | -0.11996 |
| C                      | 2.50401        | -2.63013 | 1.78235  | 0.104976                    | 0.076107 | 0.06361  |
| C                      | 1.37749        | -2.86556 | 2.60918  | 0.010021                    | -0.00111 | -0.03014 |
| C                      | 0.20855        | -3.53206 | 2.04458  | -0.00748                    | -0.06211 | -0.0982  |
| C                      | -0.9555        | -3.0021  | 2.6835   | 0.048299                    | 0.033662 | 0.03244  |
| C                      | -0.51928       | -2.02266 | 3.67194  | -0.12473                    | -0.14256 | -0.18313 |
| C                      | 0.9576         | -1.91047 | 3.61146  | -0.02131                    | -0.05979 | -0.05666 |
| C                      | 1.65416        | -0.73282 | 3.80408  | -0.05368                    | -0.05221 | -0.09641 |
| C                      | 0.88401        | 0.42789  | 4.22427  | 0.029761                    | -0.00329 | -0.04583 |
| C                      | -0.61809       | 0.30965  | 4.33966  | -0.07774                    | -0.09854 | -0.10116 |
| C                      | -1.30756       | -0.8836  | 4.02457  | 0.097847                    | 0.060603 | 0.028803 |
| C                      | -2.56326       | -0.77727 | 3.29206  | -0.09018                    | -0.1093  | -0.116   |
| C                      | -3.07825       | 0.53726  | 2.86987  | -0.05635                    | -0.07785 | -0.09966 |
| C                      | -2.37534       | 1.68603  | 3.07342  | 0.079575                    | 0.033955 | 0.024712 |
| C                      | -1.12652       | 1.61745  | 3.82434  | -0.00752                    | -0.02109 | -0.0491  |
| C                      | -0.03015       | 2.43739  | 3.41912  | -0.08989                    | -0.12712 | -0.14544 |
| C                      | -0.0807        | 3.41992  | 2.33322  | 0.102381                    | 0.075121 | 0.05632  |
| C                      | -1.36862       | 3.54831  | 1.69194  | -0.01057                    | -0.02666 | -0.04798 |
| C                      | -2.43212       | 2.71485  | 2.05138  | -0.0105                     | -0.02071 | -0.04731 |
| C                      | -3.20502       | 2.49835  | 0.84103  | 0.049707                    | 0.018654 | 0.020203 |
| C                      | -2.61937       | 3.21948  | -0.26082 | -0.07383                    | -0.08763 | -0.14919 |
| C                      | -1.44621       | 3.89926  | 0.29324  | -0.01559                    | -0.04122 | -0.04878 |
| C                      | -0.30712       | 4.0688   | -0.48624 | 0.017118                    | -0.00284 | -0.02071 |
| C                      | -0.35822       | 3.683    | -1.88585 | -0.04119                    | -0.07635 | -0.12467 |
| C                      | -1.56671       | 3.07583  | -2.50314 | 0.025573                    | 0.00406  | -0.02393 |
| C                      | -2.70272       | 2.79275  | -1.63542 | 0.042673                    | 0.01028  | -0.00365 |
| C                      | -3.40832       | 1.55745  | -1.81741 | -0.09982                    | -0.11329 | -0.13352 |
| C                      | -2.98777       | 0.54609  | -2.78904 | -0.00026                    | -0.04626 | -0.05998 |
| C                      | -1.78822       | 0.79949  | -3.56522 | -0.01965                    | -0.02225 | -0.05237 |
| C                      | -1.11607       | 2.04375  | -3.45022 | 0.06456                     | 0.014096 | -0.00934 |
| C                      | 0.35224        | 2.07352  | -3.41391 | -0.15896                    | -0.16652 | -0.19735 |
| C                      | 0.82211        | 3.07868  | -2.47179 | 0.002458                    | -0.02399 | -0.02428 |
| C                      | 2.05991        | 2.90542  | -1.76274 | 0.014513                    | 0.020501 | -0.02738 |
| C                      | 2.87051        | 1.76748  | -2.13022 | 0.075072                    | 0.016903 | 0.029335 |
| C                      | 2.43519        | 0.81865  | -3.00906 | -0.01445                    | -0.01639 | -0.10915 |
| C                      | 1.14294        | 0.89434  | -3.65519 | 0.161429                    | 0.112562 | 0.117115 |
| C                      | 2.9338         | -0.51507 | -2.64234 | -0.02361                    | -0.07993 | -0.00879 |
| C                      | 3.71986        | -0.2795  | -1.47052 | -0.00212                    | -0.0139  | -0.08261 |
| C                      | 3.67925        | 1.14062  | -1.12307 | -0.0015                     | -0.04924 | -0.08212 |
| C                      | 3.67672        | 1.58735  | 0.19365  | 0.024395                    | 0.028184 | 0.019176 |
| C                      | 3.81867        | 0.60319  | 1.20632  | 0.00578                     | -0.0175  | -0.01991 |
| C                      | 3.86317        | -0.79339 | 0.89964  | 0.05209                     | 0.00037  | -0.05798 |
| C                      | 3.78683        | -1.29274 | -0.44262 | 0.032485                    | 0.024449 | 0.042099 |
| C                      | 3.15478        | -2.53264 | -0.67192 | -0.00726                    | -0.04505 | -0.08091 |
| C                      | 3.23093        | -1.47635 | 1.98748  | -0.04376                    | -0.05108 | -0.06497 |
| C                      | 2.8151         | -0.48607 | 2.97897  | 0.019494                    | -0.02959 | -0.02762 |
| C                      | 3.16872        | 0.77749  | 2.47224  | -0.05419                    | -0.06151 | -0.10662 |
| C                      | 2.3454         | 1.9118   | 2.77372  | 0.097359                    | 0.04684  | 0.005267 |
| C                      | 1.22443        | 1.70622  | 3.64523  | -0.0925                     | -0.0908  | -0.08622 |
| C                      | 1.0479         | 3.67092  | 1.58031  | 0.004303                    | -0.03527 | -0.05919 |
| C                      | 2.2631         | 2.92205  | 1.78371  | -0.0252                     | -0.03212 | -0.03262 |
| C                      | 2.92515        | 2.7786   | 0.56204  | 0.059323                    | -0.00521 | -0.05398 |
| C                      | 2.12796        | 3.42237  | -0.46021 | 0.00123                     | -0.04116 | -0.04505 |
| C                      | 0.98455        | 3.97777  | 0.17312  | 0.019721                    | 0.000243 | -0.02406 |
| C                      | -2.46072       | -1.87254 | -2.55109 | 0.003641                    | -0.02496 | -0.01195 |
| C                      | -2.38908       | -2.88496 | -1.566   | 0.046089                    | 0.038185 | -0.02905 |
| C                      | -3.03502       | -2.71876 | -0.33258 | -0.04612                    | -0.10326 | -0.11906 |
| C                      | -3.7849        | -1.57091 | 0.02094  | 0.139221                    | 0.13855  | 0.111154 |
| C                      | -3.92765       | -0.56776 | -0.99125 | -0.07422                    | -0.09906 | -0.11041 |
| C                      | -3.30165       | -0.72843 | -2.27431 | 0.049655                    | 0.033728 | -0.00744 |
| C                      | -3.9867        | 0.83131  | -0.70457 | 0.083054                    | 0.046204 | 0.01634  |
| C                      | -3.87141       | 1.29299  | 0.63697  | -0.0232                     | -0.03424 | -0.06691 |
| C                      | -3.84025       | 0.28363  | 1.68446  | 0.0881                      | 0.05941  | 0.038268 |
| C                      | -3.77602       | -1.07877 | 1.35165  | -0.07454                    | -0.10782 | -0.12461 |
| C                      | -2.9872        | -1.75021 | 2.34613  | 0.077448                    | 0.03377  | 0.012787 |
| C                      | -2.18829       | -2.87714 | 1.98392  | -0.0169                     | -0.01987 | -0.04307 |
| C                      | -2.25561       | -3.39257 | 0.69084  | 0.080981                    | 0.038506 | 0.02563  |



**Table S15.** Mulliken atomic charges of  $[\text{DyY}]^{2+/0/2-}$  with  $\text{Dy}^{\text{B}}$  atom.

|                 | Coordinate / Å |          |          | Mulliken atomic charges / e |          |          |
|-----------------|----------------|----------|----------|-----------------------------|----------|----------|
|                 | x              | y        | z        | cation                      | neutral  | anion    |
| Y               | 0              | 0        | 2.07902  | 1.366826                    | 1.415176 | 1.441272 |
| Dy <sup>B</sup> | -0.85262       | 1.34723  | -1.14697 | 1.638486                    | 1.638486 | 1.532189 |
| S               | 0.5705         | -1.57826 | -1.01142 | 1.044402                    | 1.017553 | 0.974069 |
| N               | 0              | 0        | 0        | -2.31004                    | -2.28597 | -2.27612 |
| C               | 0.483          | -0.24695 | -3.88475 | -0.06877                    | -0.0641  | -0.08253 |
| C               | -0.98334       | -0.36067 | -3.82554 | 0.00037                     | -0.03264 | -0.04574 |
| C               | -1.35453       | -1.67069 | -3.37713 | 0.050469                    | 0.036537 | -0.00404 |
| C               | -0.1167        | -2.43156 | -3.18612 | -0.05169                    | -0.07099 | -0.06133 |
| C               | 0.9817         | -1.59206 | -3.50784 | -0.03703                    | -0.07481 | -0.09944 |
| C               | 2.27425        | -1.70251 | -2.87012 | 0.004718                    | -0.00014 | -0.13428 |
| C               | 2.41253        | -2.81591 | -1.91509 | 0.026398                    | 0.000261 | 0.008583 |
| C               | 1.29996        | -3.62713 | -1.54303 | 0.077248                    | 0.057267 | 0.028552 |
| C               | -0.02641       | -3.43874 | -2.16083 | 0.016879                    | -0.00218 | -0.14626 |
| C               | -1.18543       | -3.63066 | -1.35873 | -0.02876                    | -0.074   | -0.00427 |
| C               | -1.09516       | -3.927   | 0.04888  | -0.05758                    | -0.0723  | -0.15101 |
| C               | 0.1628         | -3.97712 | 0.71792  | 0.055723                    | 0.055108 | 0.054926 |
| C               | 1.32615        | -3.83804 | -0.11057 | -0.05024                    | -0.07832 | -0.09211 |
| C               | 2.46817        | -3.16953 | 0.44435  | -0.09181                    | -0.09287 | -0.12517 |
| C               | 2.50401        | -2.63013 | 1.78235  | 0.101368                    | 0.072746 | 0.061158 |
| C               | 1.37749        | -2.86556 | 2.60918  | 0.022525                    | 0.009419 | -0.02489 |
| C               | 0.20855        | -3.53206 | 2.04458  | -0.00402                    | -0.05964 | -0.09489 |
| C               | -0.9555        | -3.0021  | 2.6835   | 0.058559                    | 0.042214 | 0.037032 |
| C               | -0.51928       | -2.02266 | 3.67194  | -0.10987                    | -0.13171 | -0.17688 |
| C               | 0.9576         | -1.91047 | 3.61146  | -0.01052                    | -0.05293 | -0.05498 |
| C               | 1.65416        | -0.73282 | 3.80408  | -0.0742                     | -0.05753 | -0.12529 |
| C               | 0.88401        | 0.42789  | 4.22427  | 0.055184                    | 0.012749 | -0.03911 |
| C               | -0.61809       | 0.30965  | 4.33966  | -0.04356                    | -0.07065 | -0.08164 |
| C               | -1.30756       | -0.8836  | 4.02457  | 0.081462                    | 0.038882 | 0.001342 |
| C               | -2.56326       | -0.77727 | 3.29206  | -0.06848                    | -0.08817 | -0.09789 |
| C               | -3.07825       | 0.53726  | 2.86987  | -0.05764                    | -0.0813  | -0.10581 |
| C               | -2.37534       | 1.68603  | 3.07342  | 0.086054                    | 0.039865 | 0.029223 |
| C               | -1.12652       | 1.61745  | 3.82434  | -0.00015                    | -0.01855 | -0.05242 |
| C               | -0.03015       | 2.43739  | 3.41912  | -0.08316                    | -0.1213  | -0.14318 |
| C               | -0.0807        | 3.41992  | 2.33322  | 0.107639                    | 0.078033 | 0.056491 |
| C               | -1.36862       | 3.54831  | 1.69194  | -0.0188                     | -0.03328 | -0.05273 |
| C               | -2.43212       | 2.71485  | 2.05138  | -0.00394                    | -0.01588 | -0.04454 |
| C               | -3.20502       | 2.49835  | 0.84103  | 0.032053                    | 0.003574 | 0.008159 |
| C               | -2.61937       | 3.21948  | -0.26082 | -0.09227                    | -0.10397 | -0.16336 |
| C               | -1.44621       | 3.89926  | 0.29324  | -0.0067                     | -0.03014 | -0.03498 |
| C               | -0.30712       | 4.0688   | -0.48624 | 0.009157                    | -0.01045 | -0.02539 |
| C               | -0.35822       | 3.683    | -1.88585 | -0.04353                    | -0.07226 | -0.1142  |
| C               | -1.56671       | 3.07583  | -2.50314 | -0.02073                    | -0.03675 | -0.05994 |
| C               | -2.70272       | 2.79275  | -1.63542 | 0.069414                    | 0.042875 | 0.035894 |
| C               | -3.40832       | 1.55745  | -1.81741 | -0.13205                    | -0.14101 | -0.15726 |
| C               | -2.98777       | 0.54609  | -2.78904 | -0.00299                    | -0.04474 | -0.05442 |
| C               | -1.78822       | 0.79949  | -3.56522 | -0.0165                     | -0.01711 | -0.04665 |
| C               | -1.11607       | 2.04375  | -3.45022 | 0.050804                    | 0.006438 | -0.0097  |
| C               | 0.35224        | 2.07352  | -3.41391 | -0.16419                    | -0.16755 | -0.1941  |
| C               | 0.82211        | 3.07868  | -2.47179 | -0.02756                    | -0.05115 | -0.04527 |
| C               | 2.05991        | 2.90542  | -1.76274 | 0.008783                    | 0.017238 | -0.03169 |
| C               | 2.87051        | 1.76748  | -2.13022 | 0.071353                    | 0.014407 | 0.030842 |
| C               | 2.43519        | 0.81865  | -3.00906 | -0.01506                    | -0.01548 | -0.10997 |
| C               | 1.14294        | 0.89434  | -3.65519 | 0.157881                    | 0.109644 | 0.11683  |
| C               | 2.9338         | -0.51507 | -2.64234 | -0.01715                    | -0.07538 | -0.00591 |
| C               | 3.71986        | -0.2795  | -1.47052 | -0.00211                    | -0.01361 | -0.08011 |
| C               | 3.67925        | 1.14062  | -1.12307 | -0.00017                    | -0.04777 | -0.08204 |
| C               | 3.67672        | 1.58735  | 0.19365  | 0.02782                     | 0.031202 | 0.023305 |
| C               | 3.81867        | 0.60319  | 1.20632  | 0.006458                    | -0.01797 | -0.0219  |
| C               | 3.86317        | -0.79339 | 0.89964  | 0.051874                    | -0.00021 | -0.05811 |
| C               | 3.78683        | -1.29274 | -0.44262 | 0.027447                    | 0.019764 | 0.036186 |
| C               | 3.15478        | -2.53264 | -0.67192 | -0.00457                    | -0.04161 | -0.0757  |
| C               | 3.23093        | -1.47635 | 1.98748  | -0.03617                    | -0.04603 | -0.06401 |
| C               | 2.8151         | -0.48607 | 2.97897  | 0.044261                    | -0.06621 | -0.00721 |
| C               | 3.16872        | 0.77749  | 2.47224  | -0.05544                    | -0.06431 | -0.11143 |
| C               | 2.3454         | 1.9118   | 2.77372  | 0.104154                    | 0.054313 | 0.010228 |
| C               | 1.22443        | 1.70622  | 3.64523  | -0.07916                    | -0.08088 | -0.08077 |
| C               | 1.0479         | 3.67092  | 1.58031  | 0.00199                     | -0.03737 | -0.06127 |
| C               | 2.2631         | 2.92205  | 1.78371  | -0.01416                    | -0.02483 | -0.02715 |
| C               | 2.92515        | 2.7786   | 0.56204  | 0.058957                    | -0.00469 | -0.05528 |
| C               | 2.12796        | 3.42237  | -0.46021 | 0.000335                    | -0.04176 | -0.04309 |
| C               | 0.98455        | 3.97777  | 0.17312  | 0.005121                    | -0.01116 | -0.03281 |
| C               | -2.46072       | -1.87254 | -2.55109 | 0.005253                    | -0.02281 | -0.00874 |
| C               | -2.38908       | -2.88496 | -1.566   | 0.050805                    | 0.042373 | -0.025   |
| C               | -3.03502       | -2.71876 | -0.33258 | -0.04748                    | -0.10415 | -0.12206 |
| C               | -3.7849        | -1.57091 | 0.02094  | 0.13855                     | 0.138388 | 0.113709 |
| C               | -3.92765       | -0.56776 | -0.99125 | -0.08361                    | -0.10665 | -0.11783 |
| C               | -3.30165       | -0.72843 | -2.27431 | 0.040054                    | 0.025062 | -0.01359 |
| C               | -3.9867        | 0.83131  | -0.70457 | 0.072771                    | 0.037842 | 0.011862 |
| C               | -3.87141       | 1.29299  | 0.63697  | -0.02726                    | -0.03751 | -0.0714  |
| C               | -3.84025       | 0.28363  | 1.68446  | 0.096052                    | 0.065987 | 0.04505  |
| C               | -3.77602       | -1.07877 | 1.35165  | -0.07131                    | -0.1049  | -0.12355 |
| C               | -2.9872        | -1.75021 | 2.34613  | 0.084296                    | 0.038211 | 0.016125 |
| C               | -2.18829       | -2.87714 | 1.98392  | -0.01479                    | -0.01806 | -0.04294 |
| C               | -2.25561       | -3.39257 | 0.69084  | 0.07722                     | 0.034328 | 0.022347 |
